# Supplementary material for: Psychisch belastete Jugend?
Source: Springer Nature journal article supplement (doi:10.1007/s00729-023-00236-w), 2023-11-22
Supplement: MOESM1 [file 26344318]

### Gefährdungseinschätzung

| Demographische Daten |               |
|----------------------|---------------|
| Vor- und Nachname:   | Geburtsdatum: |

| Informationen zur Vorstellung   |                                              |                                             |                                                    |                                       |
|---------------------------------|----------------------------------------------|---------------------------------------------|----------------------------------------------------|---------------------------------------|
| Vorstellungsmodalität:          | Akut<br><input type="checkbox"/>             | Subakut<br><input type="checkbox"/>         | Planvorstellung<br><input type="checkbox"/>        |                                       |
| Vorstellungsdatum:              |                                              |                                             |                                                    |                                       |
| Verdachtsdiagnose:              |                                              |                                             |                                                    |                                       |
| Vorstellungsgrund:              | Selbstgefährdung<br><input type="checkbox"/> | Fremdgefährdung<br><input type="checkbox"/> | Sonstiges:<br><input type="checkbox"/>             |                                       |
| Art der Gefährdung:             | Akut<br><input type="checkbox"/>             | Chronisch<br><input type="checkbox"/>       | Entwicklungsgefährdung<br><input type="checkbox"/> | Keine<br><input type="checkbox"/>     |
| Vorstellung mit Einsatzkräften: | Polizei<br><input type="checkbox"/>          | Rettung<br><input type="checkbox"/>         | Keine<br><input type="checkbox"/>                  |                                       |
| In Begleitung von:              | Eltern<br><input type="checkbox"/>           | Betreuer:innen<br><input type="checkbox"/>  | Alleine<br><input type="checkbox"/>                | Sonstigen<br><input type="checkbox"/> |
| Patient:in bekannt:             | Bekannt<br><input type="checkbox"/>          | Unbekannt<br><input type="checkbox"/>       |                                                    |                                       |

| Bisherige Suizidversuche                    |                                |                                  |
|---------------------------------------------|--------------------------------|----------------------------------|
| Suizidversuch(e) anamnestisch bekannt:      | Ja<br><input type="checkbox"/> | Nein<br><input type="checkbox"/> |
| Suizidversuch vor der Vorstellung/Aufnahme: | Ja<br><input type="checkbox"/> | Nein<br><input type="checkbox"/> |

| Aktuelle Suizidalität                                                                                                   |                                                                          |
|-------------------------------------------------------------------------------------------------------------------------|--------------------------------------------------------------------------|
| <b>Selbsteinschätzung Patient:in</b>                                                                                    |                                                                          |
| <u>Nur wenn aus Sicht der Begutachter:in möglich, ab 11 Jahren.</u>                                                     |                                                                          |
| <input type="checkbox"/>                                                                                                | Ich denke nicht daran, mir etwas anzutun.                                |
| <input type="checkbox"/>                                                                                                | Ich denke manchmal an Selbstmord, aber ich würde es nicht tun.           |
| <input type="checkbox"/>                                                                                                | Ich möchte mich am liebsten umbringen.                                   |
| <input type="checkbox"/>                                                                                                | Ich würde mich umbringen, wenn ich die Gelegenheit dazu hätte.           |
| <b>Fremdeinschätzung Begutachter:in</b>                                                                                 |                                                                          |
| <u>Bitte jedenfalls ausfüllen:</u> Als fachliche Einschätzung aufgrund klinischen Eindrucks und bisheriger Exploration. |                                                                          |
| <input type="checkbox"/>                                                                                                | Patient:in denkt nicht daran, sich etwas anzutun.                        |
| <input type="checkbox"/>                                                                                                | Patient:in denkt manchmal an Selbstmord, aber würde es nicht tun.        |
| <input type="checkbox"/>                                                                                                | Patient:in würde sich am liebsten umbringen.                             |
| <input type="checkbox"/>                                                                                                | Patient:in würde sich umbringen, wenn er/sie die Gelegenheit dazu hätte. |

| Aufnahme                                   |                                           |
|--------------------------------------------|-------------------------------------------|
| Keine Aufnahme<br><input type="checkbox"/> | Aufnahme auf:<br><input type="checkbox"/> |

|                              |
|------------------------------|
| <b>Sonstige Anmerkungen:</b> |
|------------------------------|
